# Supplementary material for: Forest habitats and plant communities strongly predicts Megachilidae bee biodiversity
Source: PeerJ journal article supplement (doi:10.7717/peerj.16145), 2023-10-26
Supplement: SI1_post-hoc.docx [file SI1_post-hoc.docx]

|  |  | Mean difference | | P-value |
| --- | --- | --- | --- | --- |
| **United States** | | | | |
| Tree | Agriculture | 17.419 | **0.001** | |
|  | Barren | 30.506 | **< 0.001** | |
|  | Developed | 4.006 | **0.011** | |
|  | Herb | 8.819 | **< 0.001** | |
|  | Shrub | 16.662 | **< 0.001** | |
| Shrub | Agriculture | 0.756 | 0.991 | |
|  | Barren | 13.844 | 0.039 | |
|  | Developed | 11.367 | **0.046** | |
|  | Herb | -7.843 | 0.185 | |
| Herb | Agriculture | 8.599 | 0.771 | |
|  | Barren | 21.681 | **0.023** | |
|  | Developed | 19.211 | **0.024** | |
| Developed | Agriculture | -10.611 | 0.902 | |
|  | Barren | 2.476 | 0.999 | |
| Barren | Agriculture | -13.087 | 0.845 | |
| **Midwest** | | | | |
| Tree | Agriculture | 0.705 | 0.999 | |
|  | Developed | 0.413 | 0.999 | |
|  | Herb | 3.372 | 0.661 | |
|  | Shrub | 7.538 | 0.853 | |
| Shrub | Agriculture | -6.833 | 0.893 | |
|  | Developed | -7.125 | 0.885 | |
|  | Herb | -4.167 | 0.980 | |
| Herb | Agriculture | -2.667 | 0.835 | |
|  | Developed | -2.958 | 0.854 | |
| Developed | Agriculture | 0.292 | 0.999 | |
| **Northeast** | | | | |
| Tree | Agriculture | 3.239 | 0.949 | |
|  | Developed | 1.656 | 0.977 | |
|  | Herb | -16.761 | **0.003** | |
|  | Shrub | -2.094 | 0.995 | |
| Shrub | Agriculture | 5.333 | 0.936 | |
|  | Developed | 3.750 | 0.969 | |
|  | Herb | -14.667 | 0.216 | |
| Herb | Agriculture | 20.000 | **0.015** | |
|  | Developed | 18.417 | **0.005** | |
| Developed | Agriculture | 1.583 | 0.998 | |
| **Northwest** | | | | |
| Tree | Agriculture | 11.444 | 0.805 | |
|  | Barren | 12.944 | 0.909 | |
|  | Developed | 4.944 | 0.994 | |
|  | Herb | 5.632 | 0.665 | |
|  | Shrub | 2.239 | 0.990 | |
| Shrub | Agriculture | 9.206 | 0.921 | |
|  | Barren | 10.706 | 0.960 | |
|  | Developed | 2.706 | 1.000 | |
|  | Herb | 3.393 | 0.970 | |
| Herb | Agriculture | 5.813 | 0.989 | |
|  | Barren | 7.313 | 0.993 | |
|  | Developed | -0.688 | 1.000 | |
| Developed | Agriculture | 6.500 | 0.995 | |
|  | Barren | 8.000 | 0.995 | |
| Barren | Agriculture | -1.500 | 1.000 | |
| **Southeast** | | | | |
| Tree | Agriculture | -0.866 | 1.000 | |
|  | Barren | 7.134 | 0.854 | |
|  | Developed | 1.134 | 1.000 | |
|  | Herb | -1.241 | 0.995 | |
|  | Shrub | 3.384 | 0.972 | |
| Shrub | Agriculture | -4.250 | 0.972 | |
|  | Barren | 3.750 | 0.996 | |
|  | Developed | -2.250 | 0.999 | |
|  | Herb | -4.625 | 0.928 | |
| Herb | Agriculture | 0.375 | 1.000 | |
|  | Barren | 8.375 | 0.783 | |
|  | Developed | 2.375 | 0.992 | |
| Developed | Agriculture | -2.000 | 0.999 | |
|  | Barren | 6.000 | 0.955 | |
| Barren | Agriculture | -8.000 | 0.862 | |
| **Southwest** | | | | |
| Tree | Agriculture | 17.419 | **0.045** | |
| Barren | 30.507 | **0.017** | |
| Developed | 28.031 | **0.012** | |
| Herb | 8.820 | **0.054** | |
| Shrub | 16.663 | **< 0.001** | |
| Shrub | Agriculture | 0.757 | 0.999 | |
| Barren | 13.844 | 0.700 | |
| Developed | 11.368 | 0.764 | |
| Herb | -7.843 | 0.186 | |
| Herb | Agriculture | 8.600 | 0.772 | |
| Barren | 21.687 | 0.234 | |
| Developed | 19.211 | 0.241 | |
| Developed | Agriculture | -10.611 | 0.902 | |
| Barren | 2.476 | 0.999 | |
| Barren | Agriculture | -13.087 | 0.846 | |
